# Supplementary material for: 2,4-dichlorophenoxyacetic acid-induced oxidative stress: Metabolome and membrane modifications in Umbelopsis isabellina, a herbicide degrader
Source: PubMed Central journal article supplement (PMC6014680; doi:10.1371/journal.pone.0199677), 2018-06-22
Supplement: pone.0199677.s002.pdf [file pone.0199677.s002.pdf]

**S1 Table.** Multiple reaction monitoring (MRM) transitions for phospholipids identified in *U. isabellina*.

| Lipids       | MRM transitions |     | Lipids       | MRM transitions |     |
|--------------|-----------------|-----|--------------|-----------------|-----|
| PA 16:0/16:1 | 645.5           | 253 | PS 18:1/18:2 | 784.5           | 279 |
| PA 16:0/18:3 | 669.5           | 277 | PS 18:0/18:3 | 784.5           | 277 |
| PA 16:1/18:2 | 669.5           | 253 | PS 18:1/18:1 | 786.5           | 281 |
| PA 16:1/18:1 | 671.5           | 253 | PG 16:0/18:1 | 747.5           | 281 |
| PA 16:0/18:2 | 671.5           | 255 | PG 18:2/18:3 | 767.5           | 279 |
| PA 16:0/18:1 | 673.5           | 281 | PG 18:1 18:3 | 769.5           | 281 |
| PA 18:3/18:3 | 691.5           | 277 | PC 16:1/16:1 | 774.5           | 253 |
| PA 18:2/18:3 | 693.5           | 277 | PC 16:1/16:0 | 776.5           | 253 |
| PA 18:2/18:2 | 695.5           | 279 | PC 16:0/16:0 | 778.5           | 255 |
| PA 18:1/18:3 | 695.5           | 281 | PC 16:1/18:3 | 798.5           | 253 |
| PA 18:1/18:2 | 697.5           | 279 | PC 16:0/18:3 | 800.5           | 277 |
| PA 18:1/18:1 | 699.5           | 281 | PC 16:1/18:2 | 800.5           | 253 |
| PA 18:1/18:0 | 701.5           | 281 | PC 16:0/18:2 | 802.5           | 279 |
| PE 16:1/16:1 | 686.5           | 253 | PC 16:1/18:1 | 802.5           | 253 |
| PE 16:0/16:1 | 688.5           | 253 | PC 16:0/18:1 | 804.5           | 281 |
| PE 16:0/16:0 | 690.5           | 255 | PC 16:1/18:0 | 804.5           | 253 |
| PE 16:1/18:3 | 710.5           | 253 | PC 16:0/18:0 | 806.5           | 255 |
| PE 16:1/18:2 | 712.5           | 253 | PC 18:3/18:3 | 822.5           | 277 |
| PE 16:0/18:3 | 712.5           | 277 | PC 18:2/18:3 | 824.5           | 279 |
| PE 16:1/18:1 | 714.5           | 253 | PC 18:1/18:3 | 826.5           | 277 |
| PE 16:0/18:2 | 714.5           | 255 | PC 18:2/18:2 | 826.5           | 279 |
| PE 16:1/18:0 | 716.5           | 253 | PC 18:0/18:3 | 828.5           | 277 |
| PE 16:0/18:1 | 716.5           | 281 | PC 18:1/18:2 | 828.5           | 279 |
| PE 16:0/18:0 | 718.5           | 255 | PC 18:0/18:2 | 830.5           | 279 |
| PE 18:3/18:3 | 734.5           | 277 | PC 18:1/18:1 | 830.5           | 281 |
| PE 18:2/18:3 | 736.5           | 277 | PC 18:0/18:1 | 832.5           | 281 |
| PE 18:1/18:3 | 738.5           | 281 | PC 18:0/18:0 | 834.5           | 283 |
| PE 18:2/18:2 | 738.5           | 279 | PI 16:0/16:1 | 807.5           | 253 |
| PE 18:0/18:3 | 740.5           | 283 | PI 16:1/18:3 | 829.5           | 253 |
| PE 18:1/18:2 | 740.5           | 281 | PI 16:1/18:2 | 831.5           | 253 |
| PE 18:0/18:2 | 742.5           | 283 | PI 16:0/18:3 | 831.5           | 277 |

|              |       |     |              |       |     |
|--------------|-------|-----|--------------|-------|-----|
| PE 18:1/18:1 | 742.5 | 281 | PI 16:1/18:1 | 833.5 | 281 |
| PE 18:1/18:0 | 744.5 | 281 | PI 16:0/18:2 | 833.5 | 279 |
| PS 16:1/18:2 | 756.5 | 253 | PI 16:0/18:1 | 835.5 | 281 |
| PS 16:0/18:3 | 756.5 | 277 | PI 16:0/18:0 | 835.5 | 283 |
| PS 16:1/18:1 | 758.5 | 253 | PI 18:3/18:3 | 853.5 | 277 |
| PS 16:0/18:2 | 758.5 | 255 | PI 18:1/18:3 | 857.5 | 277 |
| PS 16:0/18:1 | 760.5 | 255 | PI 18:2/18:2 | 857.5 | 279 |
| PS 16:0/18:0 | 760.5 | 255 | PI 18:1/18:2 | 859.5 | 281 |
| PS 18:3/18:3 | 778.5 | 277 | PI 18:0/18:3 | 859.5 | 283 |
| PS 18:3/18:2 | 780.5 | 277 | PI 18:1/18:1 | 861.5 | 281 |
| PS 18:1/18:3 | 782.5 | 277 | PI 18:0/18:2 | 861.5 | 283 |
| PS 18:2/18:2 | 782.5 | 279 | PI 18:0/18:1 | 863.5 | 283 |
| LPC 16:0     | 494.5 | 255 | PI 18:0/18:0 | 865.5 | 283 |
| LPC 18:0     | 522.5 | 283 | LPC 16:1     | 492.5 | 253 |
| LPC 18:2     | 518.5 | 279 | LPC 18:1     | 520.5 | 281 |
| LPC 18:3     | 516.5 | 277 |              |       |     |

---
