# Supplementary material for: 2,4-dichlorophenoxyacetic acid-induced oxidative stress: Metabolome and membrane modifications in Umbelopsis isabellina, a herbicide degrader
Source: PubMed Central journal article supplement (PMC6014680; doi:10.1371/journal.pone.0199677), 2018-06-22
Supplement: pone.0199677.s003.pdf [file pone.0199677.s003.pdf]

**S2 Table.** Multiple reaction monitoring (MRM) transitions for triacylglycerols (TAGs) identified in *U. isabellina*.

| Lipids             | MRM transitions |       |
|--------------------|-----------------|-------|
| TAG 16:0/16:0/16:0 | 824.7           | 551.5 |
| TAG 16:0/16:0/18:0 | 852.8           | 551.5 |
| TAG 16:0/16:0/18:1 | 850.8           | 577.5 |
| TAG 16:0/16:1/18:1 | 848.8           | 549.5 |
| TAG 16:0/16:1/18:2 | 846.8           | 579.5 |
| TAG 16:0/18:0/18:0 | 880.8           | 577.5 |
| TAG 16:1/18:0/18:0 | 878.8           | 575.5 |
| TAG 16:0/18:1/18:1 | 876.8           | 601.5 |
| TAG 18:1/18:1/16:1 | 874.8           | 575.5 |
| TAG 18:2/16:1/18:1 | 872.8           | 575.5 |
| TAG 18:2/16:1/18:2 | 870.8           | 573.5 |
| TAG 18:3/18:3/16:0 | 868.8           | 607.5 |
| TAG 18:0/18:0/18:0 | 908.8           | 607.5 |
| TAG 18:1/18:0/18:0 | 906.8           | 605.5 |
| TAG 18:1/18:1/18:0 | 904.8           | 603.5 |
| TAG 18:1/18:1/18:1 | 902.8           | 601.5 |
| TAG 18:2/18:2/18:0 | 900.8           | 599.5 |
| TAG 18:1/18:1/18:1 | 898.8           | 601.5 |
| TAG 18:3/18:2/18:1 | 896.8           | 599.5 |
| TAG 18:3/18:2/18:2 | 894.8           | 597.6 |
| TAG 18:2/18:3/18:3 | 892.8           | 591.5 |
| TAG 18:3/18:3/18:3 | 890.8           | 575.5 |
