# Supplementary material for: 2,4-dichlorophenoxyacetic acid-induced oxidative stress: Metabolome and membrane modifications in Umbelopsis isabellina, a herbicide degrader
Source: PubMed Central journal article supplement (PMC6014680; doi:10.1371/journal.pone.0199677), 2018-06-22
Supplement: pone.0199677.s006.pdf [file pone.0199677.s006.pdf]

A)

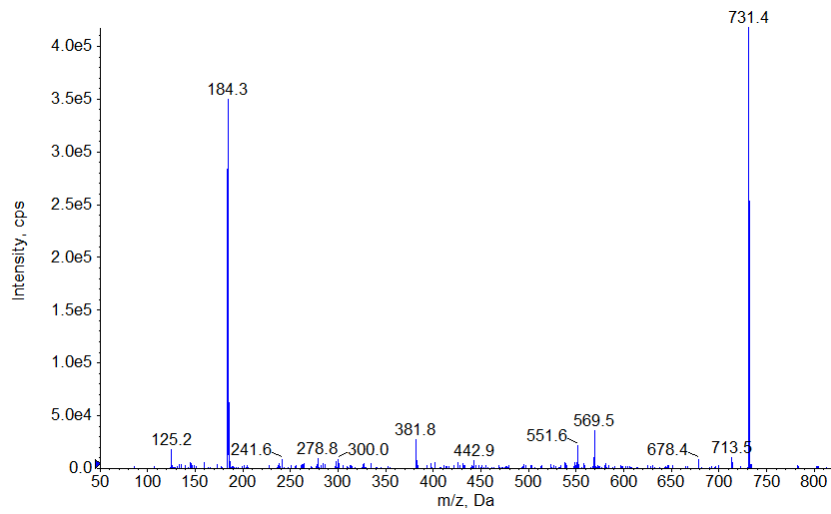

B)

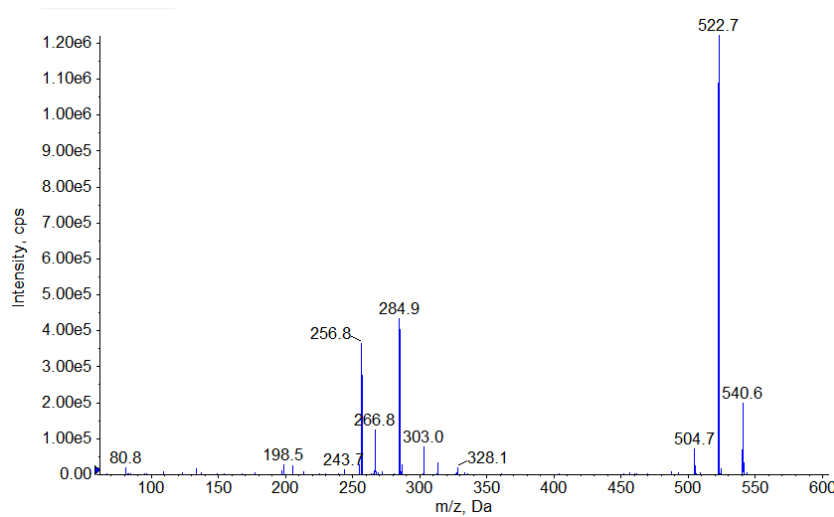

C)

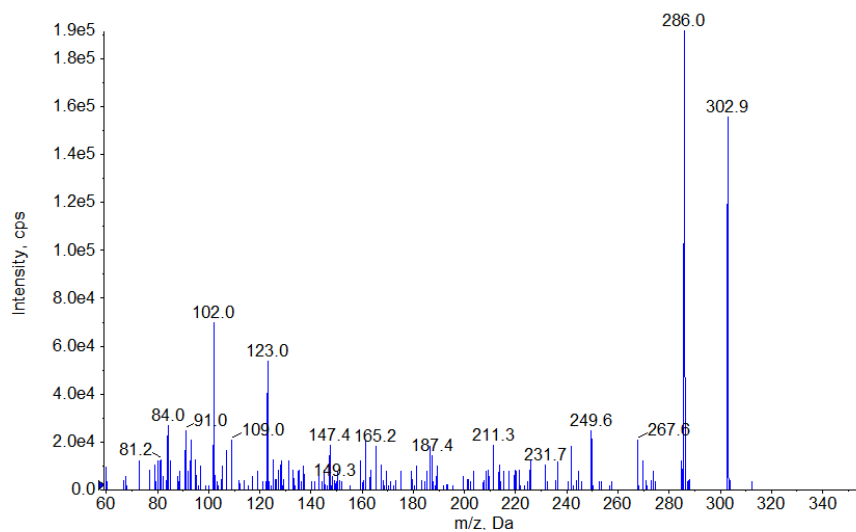

D)

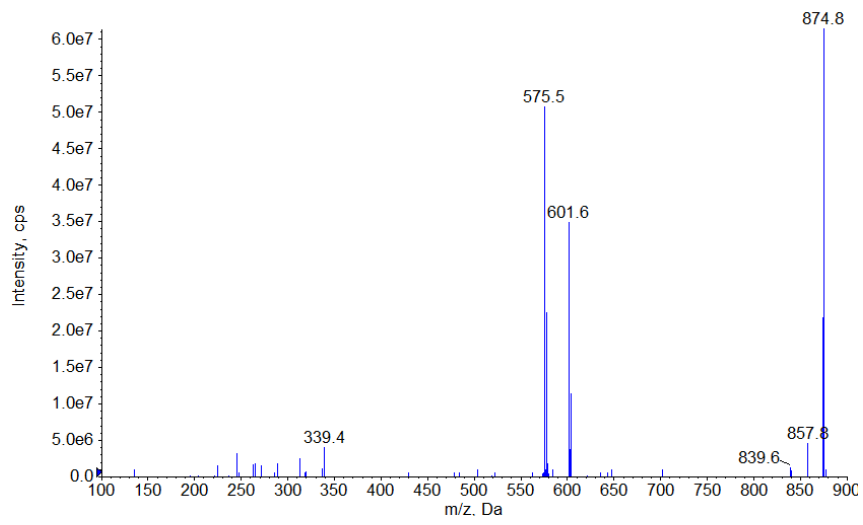

E)

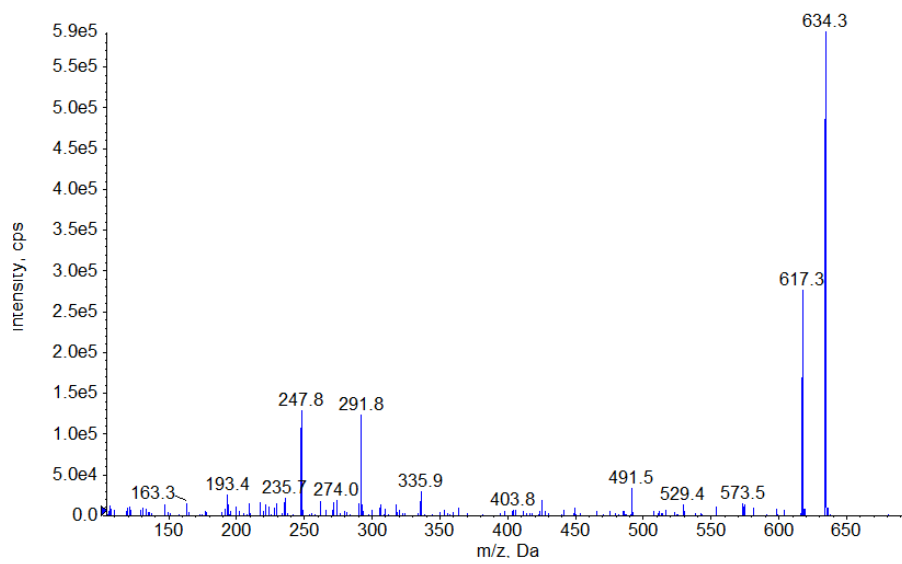

**S3 Fig.** MS/MS spectra of selected lipids. A) C18 SM; B) C16 DhCer; C) C18 dhSpH; D) TAG 52:2

E) DAG 36:4
